# Supplementary material
Source: PubMed Central journal article supplement (PMC2765542)

# Supporting Information

## A gene cluster containing two fungal polyketide synthases encode the biosynthetic pathway of a polyketide, asperfuranone, in *Aspergillus nidulans*

Yi-Ming Chiang, Edyta Szewczyk, Ashley D. Davidson, Nancy Keller, Berl R. Oakley\* & Clay C. C. Wang\*

### Table of Contents

|                                                                                                    |     |
|----------------------------------------------------------------------------------------------------|-----|
| <b>Complete Refs. 1, 2, 4, &amp; 5</b>                                                             | S2  |
| <b>Detailed Structural Characterization</b>                                                        | S3  |
| <b>Supplemental Methods</b>                                                                        | S4  |
| <b>Supplemental References</b>                                                                     | S6  |
| <b>Figure S1.</b> UV-Vis and ESIMS spectra compounds <b>1</b> , <b>2</b> , <b>3</b> , and <b>4</b> | S7  |
| <b>Figure S2.</b> Key HMBC and ROESY correlations of asperfuranone ( <b>1</b> )                    | S8  |
| <b>Figure S3.</b> $\Delta\delta$ values of the Mosher' ester of asperfuranone                      | S9  |
| <b>Table S1.</b> <i>A. nidulans</i> strains used in this study                                     | S10 |
| <b>Table S2.</b> Primers used in this study                                                        | S11 |
| <b>Table S3.</b> $^1\text{H}$ and $^{13}\text{C}$ NMR data for compounds <b>1</b> and <b>2</b>     | S13 |
| $^1\text{H}$ NMR spectrum of asperfuranone ( <b>1</b> )                                            | S14 |
| $^{13}\text{C}$ NMR spectrum of asperfuranone ( <b>1</b> )                                         | S15 |
| $^1\text{H}$ NMR spectrum of compound <b>2</b>                                                     | S16 |
| $^{13}\text{C}$ NMR spectrum of compound <b>2</b>                                                  | S17 |
| $^1\text{H}$ NMR spectrum of compound <b>1a</b>                                                    | S18 |
| $^1\text{H}$ NMR spectrum of compound <b>1b</b>                                                    | S19 |

### Complete Refs. 1, 2, 4, & 5

- (1) Askenazi, M.; Driggers, E. M.; Holtzman, D. A.; Norman, T. C.; Iverson, S.; Zimmer, D. P.; Boers, M. E.; Blomquist, P. R.; Martinez, E. J.; Monreal, A. W.; Feibelman, T. P.; Mayorga, M. E.; Maxon, M. E.; Sykes, K.; Tobin, J. V.; Cordero, E.; Salama, S. R.; Trueheart, J.; Royer, J. C.; Madden, K. T. *Nat Biotechnol* **2003**, *21*, 150-6.
- (2) Galagan, J. E.; Calvo, S. E.; Cuomo, C.; Ma, L. J.; Wortman, J. R.; Batzoglou, S.; Lee, S. I.; Basturkmen, M.; Spevak, C. C.; Clutterbuck, J.; Kapitonov, V.; Jurka, J.; Scaccocchio, C.; Farman, M.; Butler, J.; Purcell, S.; Harris, S.; Braus, G. H.; Draht, O.; Busch, S.; D'Enfert, C.; Bouchier, C.; Goldman, G. H.; Bell-Pedersen, D.; Griffiths-Jones, S.; Doonan, J. H.; Yu, J.; Vienken, K.; Pain, A.; Freitag, M.; Selker, E. U.; Archer, D. B.; Penalva, M. A.; Oakley, B. R.; Momany, M.; Tanaka, T.; Kumagai, T.; Asai, K.; Machida, M.; Nierman, W. C.; Denning, D. W.; Caddick, M.; Hynes, M.; Paoletti, M.; Fischer, R.; Miller, B.; Dyer, P.; Sachs, M. S.; Osmani, S. A.; Birren, B. W. *Nature* **2005**, *438*, 1105-15.
- (4) Machida, M.; Asai, K.; Sano, M.; Tanaka, T.; Kumagai, T.; Terai, G.; Kusumoto, K.; Arima, T.; Akita, O.; Kashiwagi, Y.; Abe, K.; Gomi, K.; Horiuchi, H.; Kitamoto, K.; Kobayashi, T.; Takeuchi, M.; Denning, D. W.; Galagan, J. E.; Nierman, W. C.; Yu, J.; Archer, D. B.; Bennett, J. W.; Bhatnagar, D.; Cleveland, T. E.; Fedorova, N. D.; Gotoh, O.; Horikawa, H.; Hosoyama, A.; Ichinomiya, M.; Igarashi, R.; Iwashita, K.; Juvvadi, P. R.; Kato, M.; Kato, Y.; Kin, T.; Kokubun, A.; Maeda, H.; Maeyama, N.; Maruyama, J.; Nagasaki, H.; Nakajima, T.; Oda, K.; Okada, K.; Paulsen, I.; Sakamoto, K.; Sawano, T.; Takahashi, M.; Takase, K.; Terabayashi, Y.; Wortman, J. R.; Yamada, O.; Yamagata, Y.; Anazawa, H.; Hata, Y.; Koide, Y.; Komori, T.; Koyama, Y.; Minetoki, T.; Suharnan, S.; Tanaka, A.; Isono, K.; Kuhara, S.; Ogasawara, N.; Kikuchi, H. *Nature* **2005**, *438*, 1157-61.
- (5) Nierman, W. C.; Pain, A.; Anderson, M. J.; Wortman, J. R.; Kim, H. S.; Arroyo, J.; Berriman, M.; Abe, K.; Archer, D. B.; Bermejo, C.; Bennett, J.; Bowyer, P.; Chen, D.; Collins, M.; Coulsen, R.; Davies, R.; Dyer, P. S.; Farman, M.; Fedorova, N.; Feldblyum, T. V.; Fischer, R.; Fosker, N.; Fraser, A.; Garcia, J. L.; Garcia, M. J.; Goble, A.; Goldman, G. H.; Gomi, K.; Griffith-Jones, S.; Gwilliam, R.; Haas, B.; Haas, H.; Harris, D.; Horiuchi, H.; Huang, J.; Humphray, S.; Jimenez, J.; Keller, N.; Khouri, H.; Kitamoto, K.; Kobayashi, T.; Konzack, S.; Kulkarni, R.; Kumagai, T.; Lafon, A.; Latge, J. P.; Li, W.; Lord, A.; Lu, C.; Majoros, W. H.; May, G. S.; Miller, B. L.; Mohamoud, Y.; Molina, M.; Monod, M.; Mouyna, I.; Mulligan, S.; Murphy, L.; O'Neil, S.; Paulsen, I.; Penalva, M. A.; Perlea, M.; Price, C.; Pritchard, B. L.; Quail, M. A.; Rabbinowitsch, E.; Rawlins, N.; Rajandream, M. A.; Reichard, U.; Renauld, H.; Robson, G. D.; Rodriguez de Cordoba, S.; Rodriguez-Pena, J. M.; Ronning, C. M.; Rutter, S.; Salzberg, S. L.; Sanchez, M.; Sanchez-Ferrero, J. C.; Saunders, D.; Seeger, K.; Squares, R.; Squares, S.; Takeuchi, M.; Tekaiia, F.; Turner, G.; Vazquez de Aldana, C. R.; Weidman, J.; White, O.; Woodward, J.; Yu, J. H.; Fraser, C.; Galagan, J. E.; Asai, K.; Machida, M.; Hall, N.; Barrell, B.; Denning, D. W. *Nature* **2005**, *438*, 1151-6.

### Detailed Structural Characterization

Asperfuranone (**1**) was isolated as light yellow gum. The molecular formula was found to be C<sub>19</sub>H<sub>24</sub>O<sub>5</sub> by its <sup>13</sup>C NMR, DEPT, and HRESIMS spectral data, representing eight indices of hydrogen deficiency (IHD). The IR spectrum showed absorptions for hydroxyl (3385 cm<sup>-1</sup>) and conjugated carbonyl (1682 and 1659 cm<sup>-1</sup>) functionalities. The <sup>1</sup>H NMR spectrum in acetone-*d*<sub>6</sub> (Table S3) exhibited signals for four methyl groups [ $\delta_{\text{H}}$  0.86 (t,  $J$  = 7.6 Hz), 1.01 (d,  $J$  = 6.4 Hz), 1.34 (s), and 1.90 (br s)], two methylenes [ $\delta_{\text{H}}$  1.35 and 1.45 (each 1H, m); 2.91 (dd,  $J$  = 18.0, 8.4 Hz) and 3.51 (dd,  $J$  = 18.0, 5.2 Hz)], two methine protons [ $\delta_{\text{H}}$  2.55 (m) and 4.13 (dd,  $J$  = 8.4, 5.2 Hz)], three olefinic protons [ $\delta_{\text{H}}$  5.88 (br d,  $J$  = 10.0 Hz), 6.84 (d,  $J$  = 15.2 Hz), and 7.41 (d,  $J$  = 15.2 Hz)], and one unusual down field aromatic proton [ $\delta_{\text{H}}$  8.82 (s)]. The <sup>1</sup>H, <sup>13</sup>C NMR and COSY data revealed the presence of a 4,6-dimethyl-2,4-octadienone moiety. The remainder of the structure was established by HMBC and COSY correlations. HMBC long-range <sup>13</sup>C-<sup>1</sup>H correlations (Figure S2a) including C-10/H<sub>2</sub>-11, H-12, H-16; C-11/H-12; C-12/H<sub>2</sub>-11, H<sub>3</sub>-19; C-13/H<sub>2</sub>-11, H-12, H<sub>3</sub>-19; C-14/H-12, H-16, H<sub>3</sub>-19; and C-15/H<sub>2</sub>-11, H-16 established 5,6-dihydroxy-5-methyl-6,7-dihydro-5*H*-isobenzofuran-4-one moiety. The 4,6-dimethyl-2,4-octadienone side chain was thus attached to the C-9 of the furan ring. The unusual down field aromatic proton was attributed to the two carbonyl groups conjugated with the furan ring. ROESY correlations (Figure S2b) for H <sub>$\alpha$</sub> -11/H-12 and H <sub>$\beta$</sub> -11/H<sub>3</sub>-19 suggested that CH<sub>3</sub>-19 should be on the same face as H <sub>$\beta$</sub> -11. The stereochemistry of C-3 was assigned as 3*S* since asperfuranone (**1**) is biosynthesized from compound **2** that the C-3 stereochemistry has been determined previously.<sup>1</sup> The absolute configuration of C-12 was determined by a modified Mosher's method.<sup>2</sup> Treatment of **1** with 1.5 equivalent of (*R*)- and (*S*)-2-methoxy-2-trifluoromethyl-2-phenylacetyl chloride (MTPACl) afforded the (*S*)- and (*R*)-MTPA esters (**1a** and **1b**, respectively).  $\Delta\delta$  values ( $\delta_{\text{S}} - \delta_{\text{R}}$ ) of H <sub>$\alpha$</sub> -11 and H <sub>$\beta$</sub> -11 showed positive values, while H<sub>3</sub>-19 was negative (Figure S3), thus indicating a 12*R*-configuration. Therefore, the stereochemistry of asperfuranone (**1**) was 3*S*, 12*R*, and 13*S*.

Compound **2**, a colorless solid, has similar <sup>1</sup>H and <sup>13</sup>C NMR data with asperfuranone (**1**) on the 4,6-dimethyl-2,4-octadienone side chain. The 4,6-dihydroxy-5-methyl-benzaldehyde moiety was established by HMBC correlations. Therefore, the structure of

compound **2** was identified as 2,4-dihydroxy-6-(5,7-dimethyl-2-oxo-*trans*-3-*trans*-5-nonadienyl)-3-methylbenzaldehyde. This structure was then confirmed by comparing its NMR data as well as optical rotations with those reported in the literature.<sup>1</sup>

## Supplemental Methods

### Isolation and identification of secondary metabolites

For structural elucidation, asperfuranone (**1**) was purified from 3 L of LMM medium inoculated with *alcA*(p)-AN1029.3 *A. nidulans* in the induction condition and extracted with EtOAc as described above. The mycelium which also containing asperfuraone (**1**) was extracted separately with 500 mL MeOH twice, with each sonicated for 1 h. Both extract were pooled to get 164.3 mg of crude extract. This extract was then applied to a SiO<sub>2</sub> gel column (Merck 230-400 mesh, ASTM, 20 × 60 mm) and eluted with CHCl<sub>3</sub>-MeOH mixtures of increasing polarity (fraction A, 1:0, 200 mL; fraction B, 19:1, 200 mL; fraction C, 9:1, 200 mL; fraction D, 7:3, 200 mL). Fraction C (67.3 mg), which contained asperfuraone (**1**), was further purified by reverse phase HPLC [Phenomenex Luna 5μm C18 (2), 250 × 10 mm] with a flow rate of 5.0 mL/min and measured by a UV detector at 254 nm. The gradient system was MeCN (solvent B) in 5 % MeCN/H<sub>2</sub>O (solvent A) both containing 0.05 % TFA: 42 to 45 % B from 0 to 20 min, 45 to 100 % B from 20 to 26 min, maintained at 100 % B from 26 to 31 min, 100 to 42 % B from 31 to 32 min, and re-equilibration with 42 % B from 32 to 37 min. Asperfuranone (**1**, 32.8 mg) was eluted at 15.0 min. 2,4-Dihydroxy-6-(5,7-dimethyl-2-oxo-*trans*-3-*trans*-5-nonadienyl)-3-methylbenzaldehyde (**2**) was purified from 3 L of LMM medium inoculated with *alcA*(p)-AN1029.3, AN1033.3Δ *A. nidulans* as described above. Crude extract was applied to a SiO<sub>2</sub> gel column (Merck 230-400 mesh, ASTM, 40 × 190 mm) and eluted with CHCl<sub>3</sub>-MeOH mixtures of increasing polarity (fraction A, 1:0, 1000 mL; fraction B, 19:1, 1000 mL; fraction C, 19:1, 1000 mL; fraction D, 7:3, 1000 mL). Fraction B (326.4 mg) was further purified by reverse phase HPLC [Phenomenex Luna 5μm C18 (2), 250 × 10 mm] with a flow rate of 5.0 mL/min and measured by a UV detector at 254 nm. The gradient system was MeCN (solvent B) in 5 % MeCN/H<sub>2</sub>O (solvent A) both containing 0.05 % TFA: 60 % B from 0 to 5 min, 60 to 100 % B from 5 to 25 min, maintained at 100 % B from 25 to 30 min, 100 to 60 % B from 30 to 31 min, and re-equilibration with 60 % B

from 31 to 35 min. Compound **2** (71.6 mg), **3** (51.6 mg), and **4** (50.3 mg) were elute at 12.6, 22.4, and 24.4 min, respectively.

**Preparation of (S)- and (R)-MTPA esters of asperfuranone (1)**

To a CH<sub>2</sub>Cl<sub>2</sub> solution (0.5 mL) of asperfuranone (**1**, 2.0 mg) were added 4-(dimethylamino)-pyridine (4.0 eq) and (*R*)- or (*S*)-MTPACl (1.5 eq) at room temperature, and stirring for overnight. After evaporation of solvent, the (*S*)- and (*R*)-MTPA esters (**1a** and **1b**, respectively) were purified by reverse phase HPLC [Phenomenex Luna 5 $\mu$ m C18 (2), 250  $\times$  10 mm] with a flow rate of 5.0 mL/min and measured by a UV detector at 254 nm. The gradient system was MeCN (solvent B) in 5 % MeCN/H<sub>2</sub>O (solvent A) both containing 0.05 % TFA: 40 to 100 % B from 0 to 20 min, maintained at 100 % B from 20 to 24 min, 100 to 40 % B from 24 to 26 min, and re-equilibration with 40 % B from 26 to 30 min. Compound **1a** (1.2 mg), and **1b** (1.5 mg) were elute at 19.1 and 19.4 min, respectively.

**(S)-MTPA ester of asperfuraonone (1a)**: colorless gum; <sup>1</sup>H NMR (CDCl<sub>3</sub>, 400 MHz)  $\delta$  8.277 (s, H-16), 7.65 - 7.55 (m, 2 H), 7.49 - 7.39 (m, 3 H), 7.449 (d, *J* = 15.6 Hz, H-6), 6.465 (d, *J* = 15.6 Hz, H-7), 5.868 (d, *J* = 10.0 Hz, H-4), 5.645 (dd, *J* = 10.0, 6.0 Hz, H-12), 3.770 (dd, *J* = 17.6, 6.0 Hz, H<sub>a</sub>-11), 3.598 (s, 3 H, OMe), 3.087 (dd, *J* = 17.6, 10.0 Hz, H<sub>b</sub>-11), 2.501 (m, H-3), 1.868 (s, H<sub>3</sub>-18), 1.52 - 1.21 (m, H<sub>2</sub>-2), 1.318 (s, H<sub>3</sub>-19), 1.019 (d, *J* = 6.8 Hz, H<sub>3</sub>-17), 0.864 (t, *J* = 7.6 Hz, H<sub>3</sub>-1); ESIMS *m/z* (rel. int.): 549.0 [M+H]<sup>+</sup> (100), 315.1 (30).

**(R)-MTPA ester of asperfuraonone (1b)**: colorless gum; <sup>1</sup>H NMR (CDCl<sub>3</sub>, 400 MHz)  $\delta$  8.275 (s, H-16), 7.69 - 7.62 (m, 2 H), 7.49 - 7.39 (m, 3 H), 7.443 (d, *J* = 15.6 Hz, H-6), 6.455 (d, *J* = 15.2 Hz, H-7), 5.866 (d, *J* = 10.0 Hz, H-4), 5.591 (dd, *J* = 10.0, 5.6 Hz, H-12), 3.748 (dd, *J* = 17.6, 5.6 Hz, H<sub>a</sub>-11), 3.634 (s, 3 H, OMe), 2.942 (dd, *J* = 17.6, 10.0 Hz, H<sub>b</sub>-11), 2.499 (m, H-3), 1.864 (s, H<sub>3</sub>-18), 1.51 - 1.23 (m, H<sub>2</sub>-2), 1.396 (s, H<sub>3</sub>-19), 1.018 (d, *J* = 6.4 Hz, H<sub>3</sub>-17), 0.863 (t, *J* = 7.6 Hz, H<sub>3</sub>-1); ESIMS *m/z* (rel. int.): 549.0 [M+H]<sup>+</sup> (100), 315.1 (30).

### Supplemental References

- (1) Matsuzaki, K.; Tahara, H.; Inokoshi, J.; Tanaka, H.; Masuma, R.; Omura, S. *J Antibiot (Tokyo)* **1998**, *51*, 1004-11.
- (2) Ohtani, I.; Kusumi, T.; Kashman, Y.; Kakisawa, H. *J Am Chem Soc* **1991**, *113*, 4092-4096.

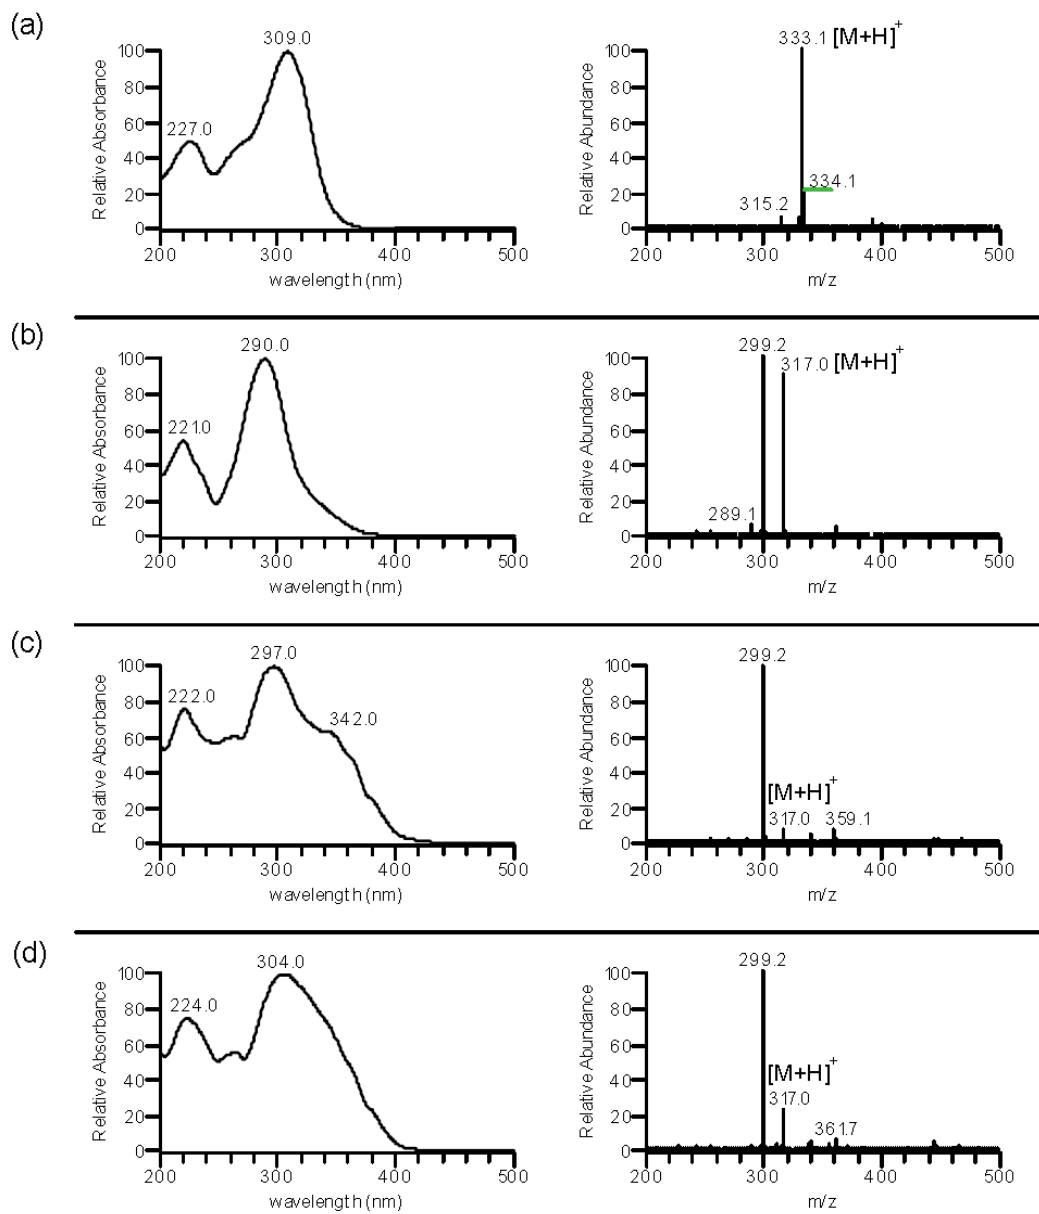

**Figure S1.** UV-Vis and ESIMS spectra (positive mode) of (a) asperfuranone (**1**), (b) 2,4-dihydroxy-6-(5,7-dimethyl-2-oxo-*trans*-3-*trans*-5-nonadienyl)-3-methylbenzaldehyde (**2**), (c) compound **3**, and (d) compound **4**.

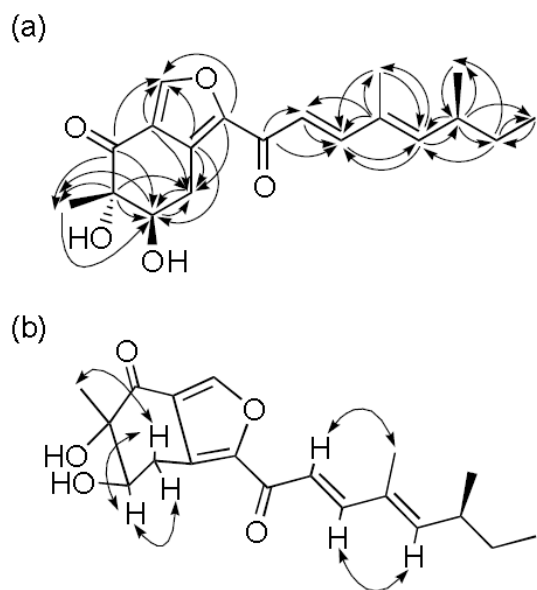

**Figure S2.** (a) Key HMBC and (b) key ROESY correlations of asperfuranone (**1**).



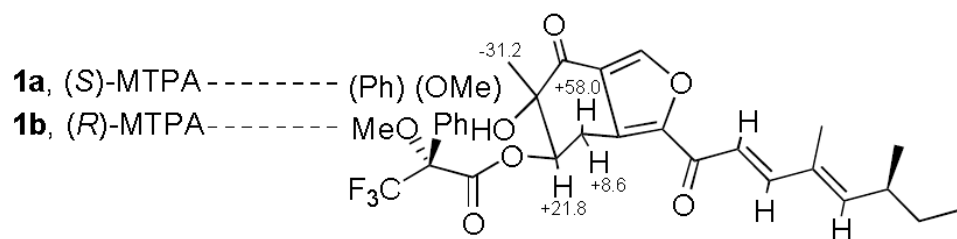

**Figure S3.**  $\Delta\delta$  values [ $\Delta\delta$  (in Hz) =  $\delta_S - \delta_R$ ] obtained from the (*S*)- and (*R*)-MTPA esters (**1a** and **1b**, respectively).

**Table S1.** *A. nidulans* strains used in this study

| strain                               | genotype                                                                                                               |
|--------------------------------------|------------------------------------------------------------------------------------------------------------------------|
| <i>alcA</i> (p)-AN1029.3             | <i>pyrG89; pyroA4, nkuA::argB; riboB2, stcJ::riboB; AN1029.3::AfpyrG-alcA</i> (p)-AN1029.3                             |
| <i>alcA</i> (p)-AN1029.3, AN1027.3Δ  | <i>pyrG89; pyroA4, nkuA::argB; riboB2, stcJ::riboB; AN1029.3::AfpyrG-alcA</i> (p)-AN1029.3; AN1027.3:: <i>AfpyroA</i>  |
| <i>alcA</i> (p)-AN1029.3, AN1028.3Δ  | <i>pyrG89; pyroA4, nkuA::argB; riboB2, stcJ::riboB; AN1029.3::AfpyrG-alcA</i> (p)-AN1029.3; AN1028.3:: <i>AfpyroA</i>  |
| <i>alcA</i> (p)-AN1029.3, AN1030.3Δ  | <i>pyrG89; pyroA4, nkuA::argB; riboB2, stcJ::riboB; AN1029.3::AfpyrG-alcA</i> (p)-AN1029.3; AN1030.3:: <i>AfpyroA</i>  |
| <i>alcA</i> (p)-AN1029.3, AN1031.3Δ  | <i>pyrG89; pyroA4, nkuA::argB; riboB2, stcJ::riboB; AN1029.3::AfpyrG-alcA</i> (p)-AN1029.3; AN1031.3:: <i>AfpyroA</i>  |
| <i>alcA</i> (p)-AN1029.3, AN1032.3Δ  | <i>pyrG89; pyroA4, nkuA::argB; riboB2, stcJ::riboB; AN1029.3::AfpyrG-alcA</i> (p)-AN1029.3; AN1032.3:: <i>AfpyroA</i>  |
| <i>alcA</i> (p)-AN1029.3, AN1033.3Δ  | <i>pyrG89; pyroA4, nkuA::argB; riboB2, stcJ::riboB; AN1029.3::AfpyrG-alcA</i> (p)-AN1029.3; AN1033.3:: <i>AfpyroA</i>  |
| <i>alcA</i> (p)-AN1029.3, AN1034.3Δ  | <i>pyrG89; pyroA4, nkuA::argB; riboB2, stcJ::riboB; AN1029.3::AfpyrG-alcA</i> (p)-AN1029.3; AN1034.3:: <i>AfpyroA</i>  |
| <i>alcA</i> (p)-AN1029.3, AN1035.3Δ  | <i>pyrG89; pyroA4, nkuA::argB; riboB2, stcJ::riboB; AN1029.3::AfpyrG-alcA</i> (p)-AN1029.3; AN1035.3:: <i>AfpyroA</i>  |
| <i>alcA</i> (p)-AN1029.3, AN11287.3Δ | <i>pyrG89; pyroA4, nkuA::argB; riboB2, stcJ::riboB; AN1029.3::AfpyrG-alcA</i> (p)-AN1029.3; AN11287.3:: <i>AfpyroA</i> |
| <i>alcA</i> (p)-AN1029.3, AN1036.3Δ  | <i>pyrG89; pyroA4, nkuA::argB; riboB2, stcJ::riboB; AN1029.3::AfpyrG-alcA</i> (p)-AN1029.3; AN1036.3:: <i>AfpyroA</i>  |
| <i>alcA</i> (p)-AN1029.3, AN1037.3Δ  | <i>pyrG89; pyroA4, nkuA::argB; riboB2, stcJ::riboB; AN1029.3::AfpyrG-alcA</i> (p)-AN1029.3; AN1037.3:: <i>AfpyroA</i>  |
| <i>alcA</i> (p)-AN1029.3, AN11288.3Δ | <i>pyrG89; pyroA4, nkuA::argB; riboB2, stcJ::riboB; AN1029.3::AfpyrG-alcA</i> (p)-AN1029.3; AN11288.3:: <i>AfpyroA</i> |

AN1029.3::*AfpyrG-alcA*(p)-AN1029.3 is a replacement of the endogenous promoter of AN1029.3 with the *alcA* promoter and the *A. fumigatus pyrG* gene (*AfpyrG*). *AfpyroA* is the *A. fumigatus pyroA* gene and *AfriboB* is the *A. fumigatus riboB* gene.

**Table S2.** Primers used in this study

| primer          | Sequence (5'→3')                                           |
|-----------------|------------------------------------------------------------|
| alcA_AN1029.3P1 | GGA GCG ACA GAA CCA AAG TC                                 |
| alcA_AN1029.3P2 | TGG GCC ATG GGC TAT CTT CC                                 |
| alcA_AN1029.3P3 | CGA AGA GGG TGA AGA GCA TTG TTA CGA GCG AGT TAC GAA CG     |
| alcA_AN1029.3P4 | ATC CTA TCA CCT CGC CTC AAA ATG GCG TGT CCC ACC AGA CG     |
| alcA_AN1029.3P5 | TGC TGG GGT ATG GCT ATC TC                                 |
| alcA_AN1029.3P6 | ATG GCA GTG AGC AGA CAT TG                                 |
| AN1027.3P1      | ACG CGG TAA GTT TTG TCT CC                                 |
| AN1027.3P2      | AGC ACT TCG TTG GAA ACA GG                                 |
| AN1027.3P3      | CGA AGA GGG TGA AGA GCA TTG CTC TCA CGT GGC TTC TAG ACC    |
| AN1027.3P4      | GCA TCA GTG CCT CCT CTC AGA CAG GTC TTT GGG CTT TTG AGT CG |
| AN1027.3P5      | CTG CGC CTT GTC TTC TCT CC                                 |
| AN1027.3P6      | GGG AGC ACA AAT TCT TAG CC                                 |
| AN1028.3P1      | GTT CCT ACC CGA TAC GTT GG                                 |
| AN1028.3P2      | GCA TCT GCT ACG AGT GTT AAG C                              |
| AN1028.3P3      | CGA AGA GGG TGA AGA GCA TTG TCC TTC TGT CAG AGA CAC TGG    |
| AN1028.3P4      | GCA TCA GTG CCT CCT CTC AGA CAG GGA TTT CAT GTC CAG TGT CG |
| AN1028.3P5      | TGT CAA GGA GCG AAG ATT GG                                 |
| AN1028.3P6      | CAG TGG AAC AAC CGT AGA CC                                 |
| AN1030.3P1      | GCC TAC AGC ATT CCA TTT CG                                 |
| AN1030.3P2      | GCC ATC TCC GTG GTA TTT GC                                 |
| AN1030.3P3      | CGA AGA GGG TGA AGA GCA TTG ACG GTA ACG TGG TTC AGT GC     |
| AN1030.3P4      | GCA TCA GTG CCT CCT CTC AGA CAG AAT ACT GCG CTT GGT GAT GG |
| AN1030.3P5      | GTA GAA TGC CGC TGA CAA GG                                 |
| AN1030.3P6      | TTT TAC ATA CCC CCG GAA CC                                 |
| AN1031.3P1      | GGA TGT GAC GTC TGT CTA TGG                                |
| AN1031.3P2      | TAG GAG CTG GGT TCC TGT TCC                                |
| AN1031.3P3      | CGA AGA GGG TGA AGA GCA TTG TCT GGG ACT CTA CCT CCT TCC    |
| AN1031.3P4      | GCA TCA GTG CCT CCT CTC AGA CAG GAA GAT TGG CCT TGG TAC GG |
| AN1031.3P5      | GAT CTC TTA TCC GCC CTC AAG G                              |
| AN1031.3P6      | AGC CAC GTC TTT GAC TAC CG                                 |
| AN1032.3P1      | ACC TCA GCA CCA CTT TCT GG                                 |
| AN1032.3P2      | CAA ACC TCA CAA CCC TCT CG                                 |
| AN1032.3P3      | CGA AGA GGG TGA AGA GCA TTG CAA TGG CAG ATC GTC TAT GC     |
| AN1032.3P4      | GCA TCA GTG CCT CCT CTC AGA CAG AAG GAT CAG GAT GCA ACT CC |
| AN1032.3P5      | TCT GCA TGG TCG CCT AGT AGG                                |
| AN1032.3P6      | AGC TGG TGC ATC TTC TCT GC                                 |
| AN1033.3P1      | TAA AGA GCC AGA CCC AAA GC                                 |
| AN1033.3P2      | GGC AAA TAA GAC AGC GAA GC                                 |
| AN1033.3P3      | CGA AGA GGG TGA AGA GCA TTG AGG ATG CCG GTA CCA GTA GG     |
| AN1033.3P4      | GCA TCA GTG CCT CCT CTC AGA CAG TGT CTA AAG GCG TCC ACT GC |
| AN1033.3P5      | ATA TCG CGG GCT ATA TCA GG                                 |
| AN1033.3P6      | CAT CTG TCC AGT TCA GAC AAG G                              |
| AN1034.3P1      | GCT TGT TCT CGC TGA GTT GC                                 |
| AN1034.3P2      | CGC TGA GTT GCT TGA GAA GG                                 |
| AN1034.3P3      | CGA AGA GGG TGA AGA GCA TTG CTG TCC CTT GGG GAA GTA GG     |
| AN1034.3P4      | GCA TCA GTG CCT CCT CTC AGA CAG TCA CCT CAA CTC CGC TAT CC |
| AN1034.3P5      | ACG GCA TGC TTA AGA AGG AGA AGG                            |
| AN1034.3P6      | AAG AGC CCT GTT TCG TAC CC                                 |
| AN1035.3P1      | CTG GCG TAT TCT GGT GTT GG                                 |
| AN1035.3P2      | GCC ATG CCC TGT AAC TTG AGT AG                             |
| AN1035.3P3      | CGA AGA GGG TGA AGA GCA TTG TGG GTG TGC AAG ATA GG         |
| AN1035.3P4      | GCA TCA GTG CCT CCT CTC AGA CAG TTT CCG ACT TAT GCC TGA GC |
| AN1035.3P5      | GAG TCT GGA CCC TGT TTT CG                                 |

|             |                                                               |
|-------------|---------------------------------------------------------------|
| AN1035.3P6  | CGC TTG GAC AGA AAC TCA CC                                    |
| AN11287.3P1 | CAT CTT CAT GGT CCC TGT GG                                    |
| AN11287.3P2 | CGA TAT CGA TCT GAC CAA GC                                    |
| AN11287.3P3 | CGA AGA GGG TGA AGA GCA TTG GAG ATC TTG GAG GGG AAT CG        |
| AN11287.3P4 | GCA TCA GTG CCT CCT CTC AGA CAG TAT CTT GCC AGG ACC AAA CC    |
| AN11287.3P5 | TCA ACG AGA CCC TCT TGA CC                                    |
| AN11287.3P6 | CGA TAA TGT CCT CCC TCC TGA AC                                |
| AN1036.3P1  | ATG GAG TTG GAG CCT GTA CC                                    |
| AN1036.3P2  | GCC TGT ACC TTT GTC GAT AAG C                                 |
| AN1036.3P3  | CGA AGA GGG TGA AGA GCA TTG GAA TCT GTG CCA GTT GAT GG        |
| AN1036.3P4  | GCA TCA GTG CCT CCT CTC AGA CAG AGT TTG CTC TGG GTG TCT GG    |
| AN1036.3P5  | CTC TTA CCT GCG AGG ACT GG                                    |
| AN1036.3P6  | ATG TCC CCT CCG CTT TTA GC                                    |
| AN1037.3P1  | GCG AAT TGG TGG TAT CAT CG                                    |
| AN1037.3P2  | GTT GGG AGG AAT TTG AGT GG                                    |
| AN1037.3P3  | CGA AGA GGG TGA AGA GCA TTG TGG AAC TGG TTA GGC ACA GC        |
| AN1037.3P4  | GCA TCA GTG CCT CCT CTC AGA CAG CTT GGC TAG GCG TAT GAT GG    |
| AN1037.3P5  | GAA ATC TCC GGA CCA TGT GC                                    |
| AN1037.3P6  | TGA CCT GAC TCC AGA AAT CTC C                                 |
| AN11288.3P1 | TCC ATA ACC ACC ATC CAT CG                                    |
| AN11288.3P2 | GGC TGG AAT CAA CAA AGC TCC                                   |
| AN11288.3P3 | CGA AGA GGG TGA AGA GCA TTG ACG GAA GCC CAG ATA TTT CC        |
| AN11288.3P4 | GCA TCA GTG CCT CCT CTC AGA CAG ATC GCC ATC CTA CTC AAT CC    |
| AN11288.3P5 | GCT CCG ACT GAC AAA TCT CC                                    |
| AN11288.3P6 | AAA TCC AAG TCG TCC TCA CG                                    |
| AN1038.3P1  | AAC CTT GTT CCG CAT AGA CC                                    |
| AN1038.3P2  | CTG ACC GGT AAT TCC TCA CC                                    |
| AN1038.3P3  | CGA AGA GGG TGA AGA GCA TTG GGC AGT CGG GTT ACA ATA GC        |
| AN1038.3P4  | GCA TCA GTG CCT CCT CTC AGA CAG TTA CGA AAC TCG ACC CCT GAT G |
| AN1038.3P5  | AGA CCA GCC AAT CAC TCA CC                                    |
| AN1038.3P6  | ATG GAC CTC GAT CCT TGC CAT AC                                |

Blue and red sequences are tails that anneal to the *A. fumigatus pyroA* (*AfpyroA*) or *alcA* promoter fragment during fusion PCR

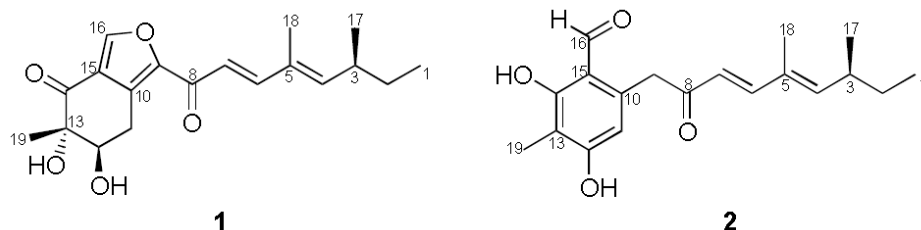

**Table S3.**  $^1\text{H}$  and  $^{13}\text{C}$  NMR data for compounds **1** and **2** (400 and 100 MHz in acetone- $d_6$ )

| position | <b>1</b>                    |                                                                             | <b>2</b>                    |                                  |
|----------|-----------------------------|-----------------------------------------------------------------------------|-----------------------------|----------------------------------|
|          | $\delta_{\text{C}}$ , mult. | $\delta_{\text{H}}$ ( $J$ in Hz)                                            | $\delta_{\text{C}}$ , mult. | $\delta_{\text{H}}$ ( $J$ in Hz) |
| 1        | 12.3, CH <sub>3</sub>       | 0.86, t (7.6)                                                               | 12.3, CH <sub>3</sub>       | 0.85, t (7.2)                    |
| 2        | 30.7, CH <sub>2</sub>       | 1.35, 1.45, m                                                               | 30.7, CH <sub>2</sub>       | 1.32, 1.43, m                    |
| 3        | 35.9, CH                    | 2.55, m                                                                     | 35.8, CH                    | 2.53, m                          |
| 4        | 150.9, CH                   | 5.88, br d (10.0)                                                           | 150.6, CH                   | 5.84, br d (9.6)                 |
| 5        | 133.3, qC                   | —                                                                           | 133.1, qC                   | —                                |
| 6        | 149.6, CH                   | 7.41, d (15.2)                                                              | 149.3, CH                   | 7.36, d (15.6)                   |
| 7        | 122.1, CH                   | 6.84, d (15.2)                                                              | 124.4, CH                   | 6.27, d (15.6)                   |
| 8        | 184.9, qC                   | —                                                                           | 197.0, qC                   | —                                |
| 9        | 128.3, qC                   | —                                                                           | 44.2, CH <sub>2</sub>       | 4.25, s                          |
| 10       | 135.9, qC                   | —                                                                           | 139.8, qC                   | —                                |
| 11       | 29.3, CH <sub>2</sub>       | 2.91, dd ( $H_{\beta}$ , 18.0, 8.4)<br>3.51, dd ( $H_{\alpha}$ , 18.0, 5.2) | 111.7, CH                   | 6.47, s                          |
| 12       | 75.1, CH                    | 4.13, dd (8.4, 5.2)                                                         | 163.7, qC                   | —                                |
| 13       | 78.8, qC                    | —                                                                           | 110.7, qC                   | —                                |
| 14       | 188.6, qC                   | —                                                                           | 164.9, qC                   | —                                |
| 15       | 147.9, qC                   | —                                                                           | 113.7, qC                   | —                                |
| 16       | 154.2, CH                   | 8.82, s                                                                     | 195.1, CH                   | 9.90, s                          |
| 17       | 20.4, CH <sub>3</sub>       | 1.01, d (6.4)                                                               | 20.4, CH <sub>3</sub>       | 0.99, d (6.8)                    |
| 18       | 12.8, CH <sub>3</sub>       | 1.90, br s                                                                  | 12.6, CH <sub>3</sub>       | 1.82, br s                       |
| 19       | 18.7, CH <sub>3</sub>       | 1.34, s                                                                     | 7.4, CH <sub>3</sub>        | 2.03, s                          |
| 12-OH    | —                           | 4.40 <sup>a</sup> , br s                                                    | —                           | 9.68, br s                       |
| 13-OH    | —                           | 4.58 <sup>a</sup> , br s                                                    | —                           | —                                |
| 14-OH    | —                           | —                                                                           | —                           | 12.78, s                         |

<sup>a</sup> Values bearing the same superscript may be interchanged.

Automation directory: /home/walkup/vnmrsys/data/auto\_2007.05.15  
Sample id : s\_20081013\_003

Pulse Sequence: s2pu1  
Solvent: acetone  
Temp: 25.0 C / 298.1 K  
Operator: walkup  
File: Proton\_01  
Mercury-400BB "MVX"

Relax. delay 1.000 sec  
Pulse 90.0 degrees  
Acq. time 1.998 sec  
Width 4800.8 Hz  
8 repetitions  
OBSERVE H1, 400.1103569 MHz  
DATA PROCESSING  
FT size 32768  
Total time 0 min, 25 sec

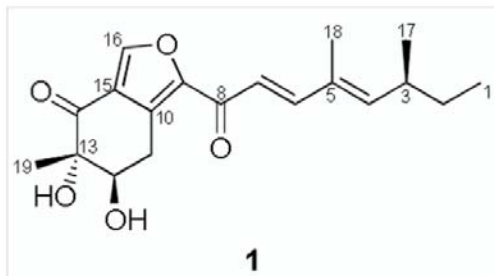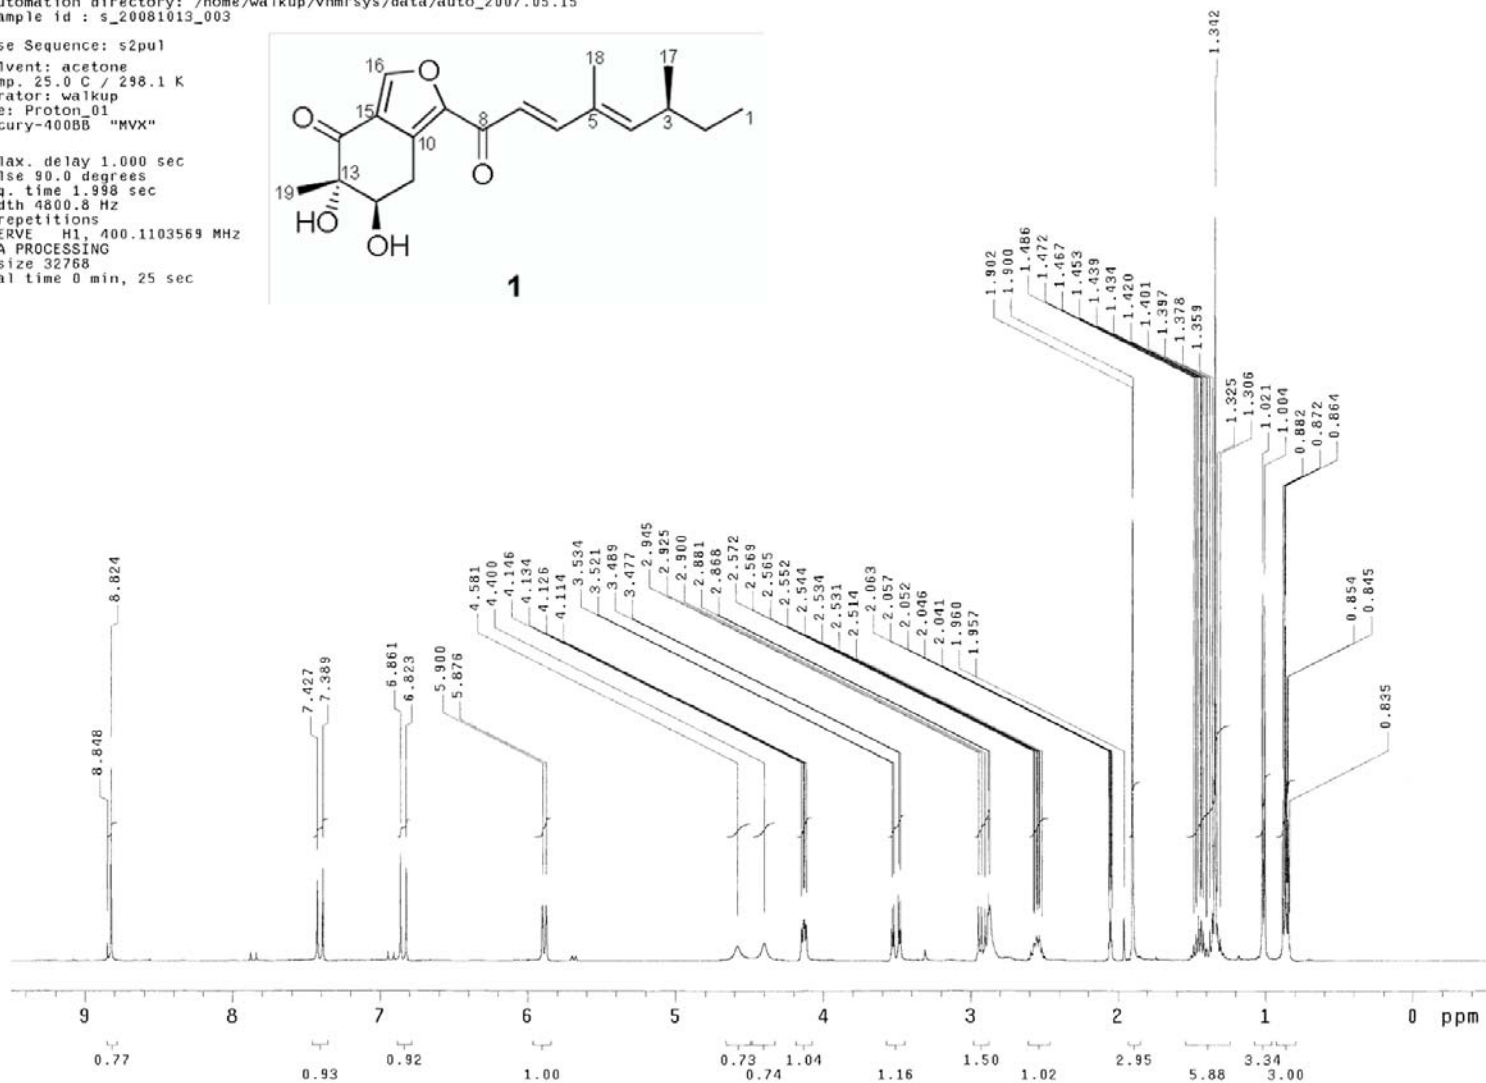

Automation directory: /home/walkup/vnmr/sys/data/auto\_2007.05.15  
Sample id : s\_20081010\_001

Pulse Sequence: s2pul  
Solvent: acetone  
Temp. 25.0 C / 298.1 K  
Operator: walkup  
File: Carbon\_01  
Mercury-400BB "MVX"

Relax. delay 2.000 sec  
Pulse 45.0 degrees  
Acq. time 1.300 sec  
Width 24154.6 Hz  
5000 repetitions  
OBSERVE C13, 100.6077314 MHz  
DECOUPLE H1, 400.1124023 MHz  
Power 35 dB  
continuously on  
WALTZ-16 modulated  
DATA PROCESSING  
Line broadening 0.5 Hz  
FT size 65536  
Total time 4 hr, 42 min, 47 sec

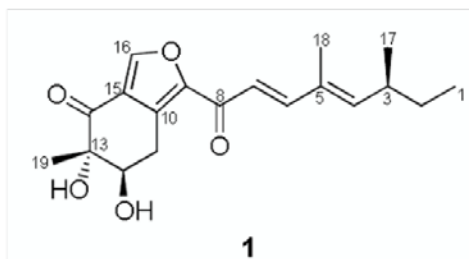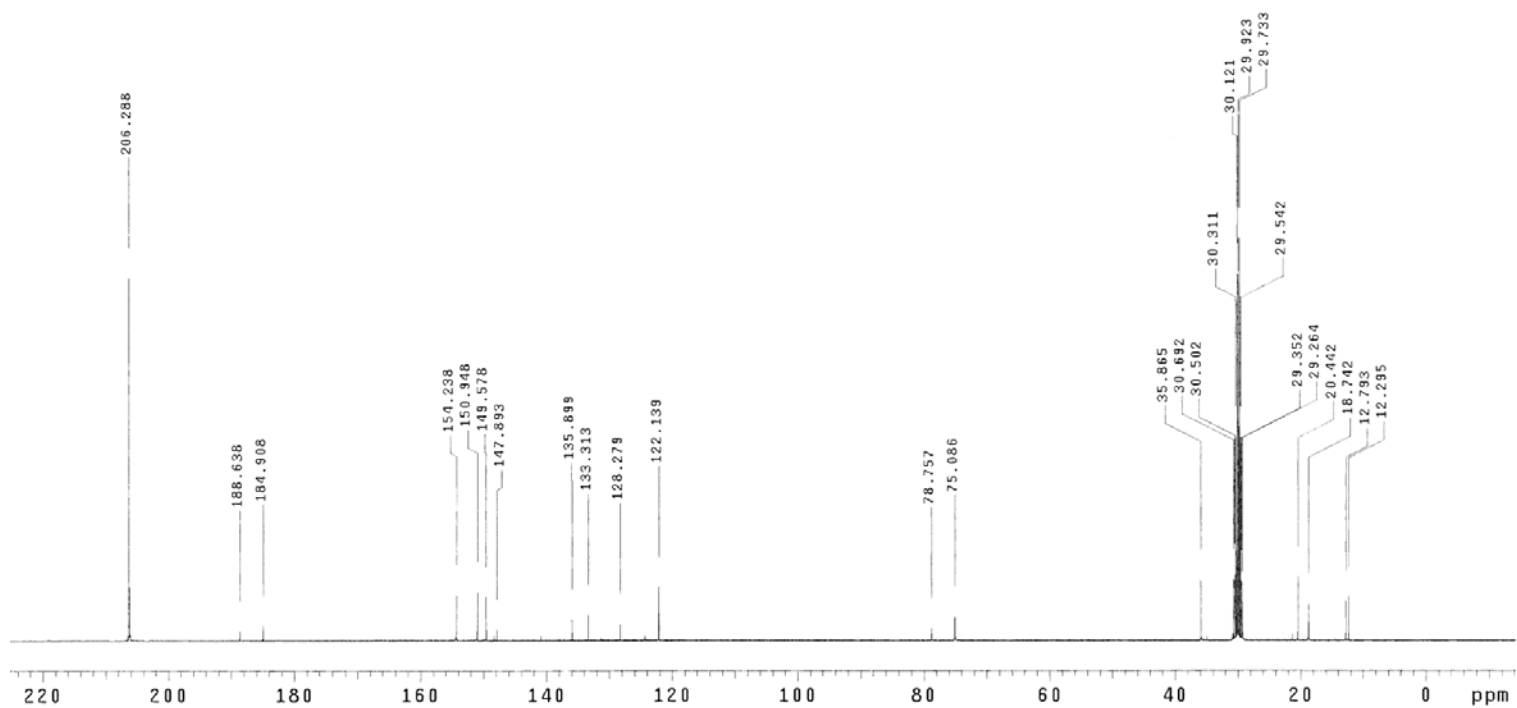

20080814H\_L02954\_C1

Automation directory:

Pulse Sequence: s2pu1  
Solvent: acetone  
Temp. 25.0 C / 298.1 K  
Operator: wang  
Mercury-400BB "MVX"

Relax. delay 1.000 sec  
Pulse 45.0 degrees  
Acq. time 1.998 sec  
Width 6402.0 Hz  
16 repetitions  
OBSERVE H1, 400.1103568 MHz  
DATA PROCESSING  
FT size 32768  
Total time 0 min, 55 sec

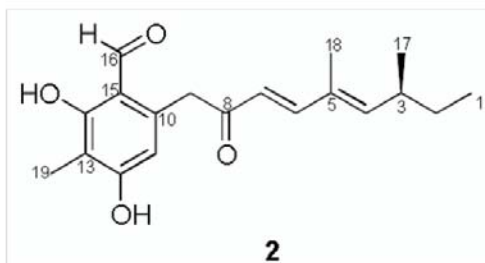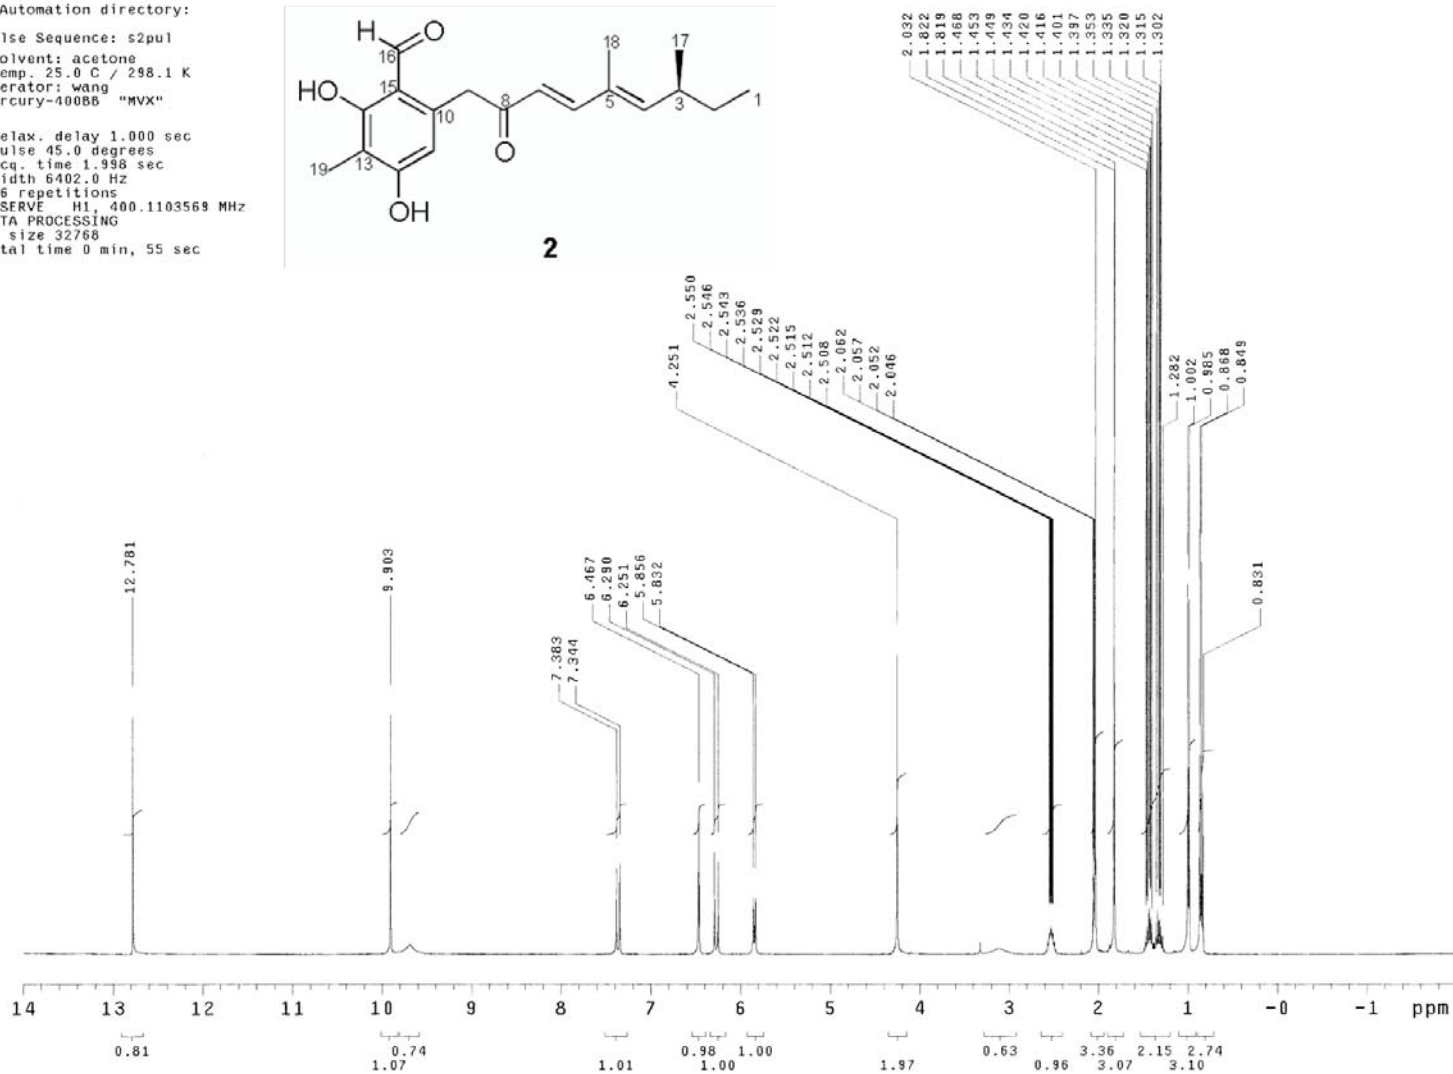



20080814C\_L02954\_C1

Automation directory:

Pulse Sequence: s2pul  
Solvent: acetone  
Temp: 25.0 C / 298.1 K  
Operator: wang  
Mercury-400BB "MVX"

Relax. delay 2.000 sec  
Pulse 45.0 degrees  
Acq. time 1.300 sec  
Width 24154.6 Hz  
60 repetitions  
OBSERVE C13, 100.6077328 MHz  
DECOUPLE H1, 400.1124023 MHz  
Power 35 dB  
Continuously on  
WALTZ-16 modulated  
DATA PROCESSING  
Line broadening 0.5 Hz  
FT size 65536  
Total time 7 min, 11 sec

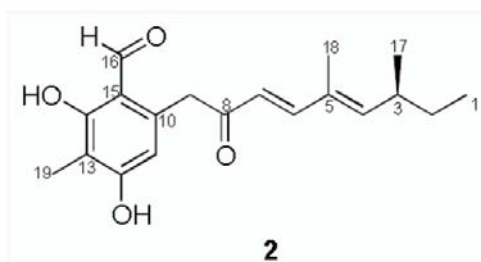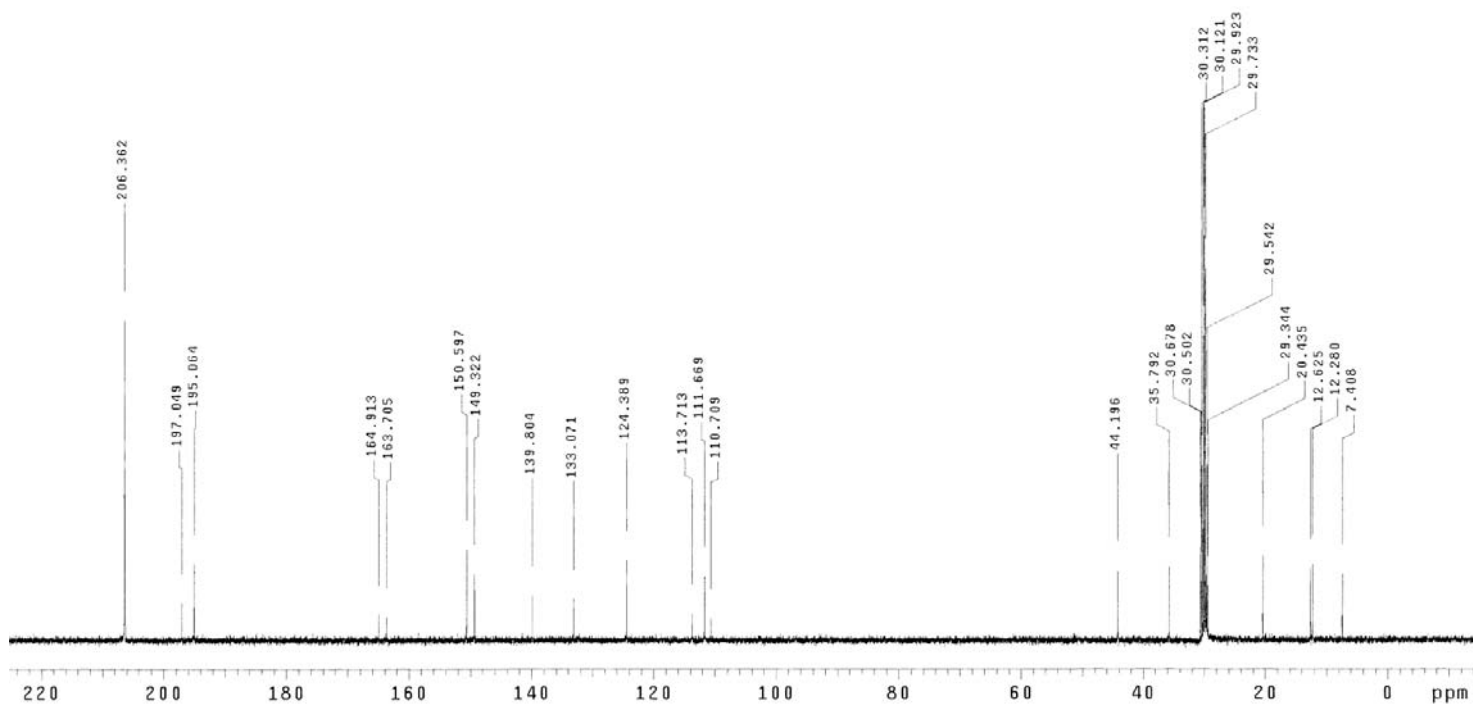

20081029H\_L02343\_C1\_RtoS1

Automation directory:

Pulse Sequence: s2pul  
Solvent: cdcl3  
Temp. 25.0 C / 298.1 K  
Operator: Wang  
Mercury-400BB "MVX"

Relax. delay 1.000 sec  
Pulse 45.0 degrees  
Acq. time 1.998 sec  
Width 6402.0 Hz  
200 repetitions  
OBSERVE H1, 400.1082803 MHz  
DATA PROCESSING  
FT size 32768  
Total time 11 min, 32 sec

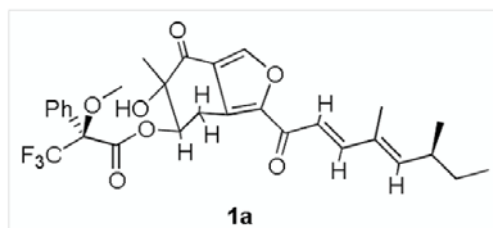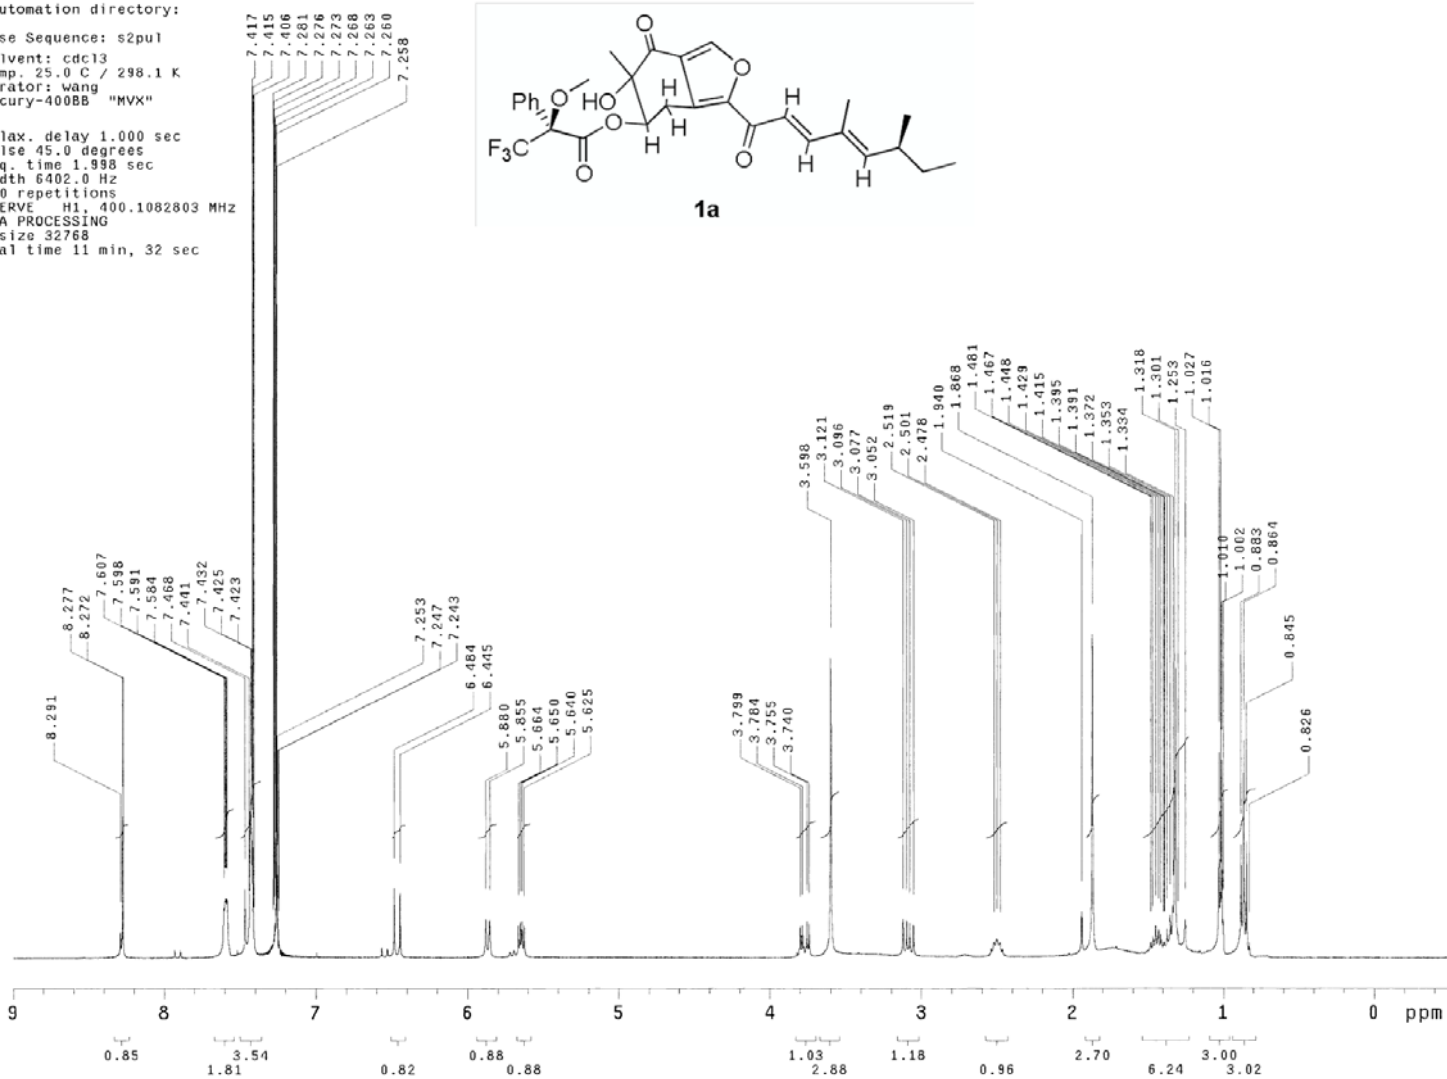

20081028H\_L02343\_C1\_StoR1

Automation directory:

Pulse Sequence: s2pu1  
Solvent: cdc13  
Temp. 25.0 C / 298.1 K  
Operator: wang  
Mercury-400BB "MVX"

Relax. delay 1.000 sec  
Pulse 45.0 degrees  
Acq. time 1.998 sec  
Width 6402.0 Hz  
300 repetitions  
OBSERVE H1 400.1082803  
DATA PROCESSING  
FT size 32768  
Total time 11 min. 32 sec

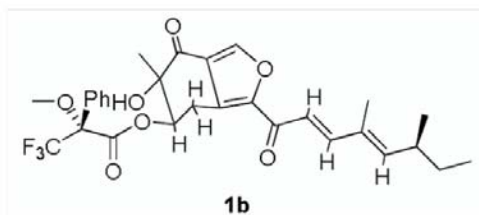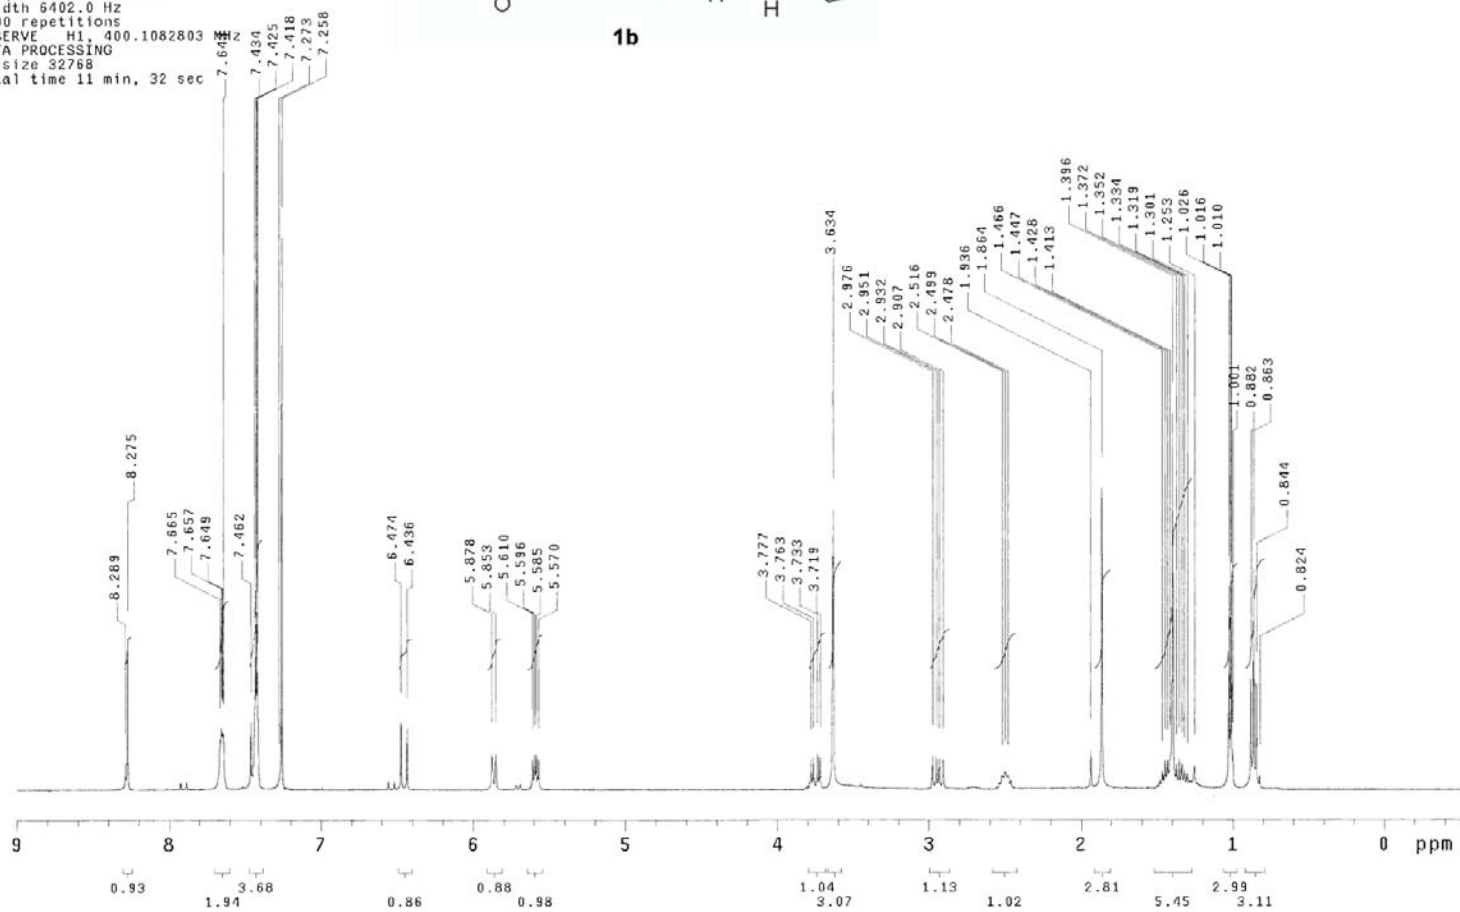

Supplement: NIHMS94177-supplement-1_si_002.pdf [file NIHMS94177-supplement-1_si_002.pdf]
